# Supplementary material for: Patient Acceptance of Noninvasive and Invasive Coronary Angiography
Source: PubMed Central journal article supplement (PMC1796945; doi:10.1371/journal.pone.0000246), 2007-02-28
Supplement: pone.0000246.s001.pdf [file pone.0000246.s001.pdf]

## Supporting Information

### Patient Acceptance Questionnaire CT/MRI/Angio

Patient No.: .....

#### CT

1. Please rate the preparation and information prior to this test.

Very good  Good  Barely Acceptable  Poor  Very poor

2. Please rate your degree of concern prior to this test.

No concern  Little  Moderate  Intense  Very intense

In case you were concerned: **Why** were you concerned? .....

3. Please rate the comfort of this test.

Very good  Good  Barely Acceptable  Poor  Very poor

4. Please rate your degree of helplessness during this test.

No helplessness  Little  Moderate  Intense  Very intense

5. Please rate your pain during and after this test on the following scale.

*No pain*

\_\_\_\_\_

*Maximum pain*

6. Would you be willing to undergo this test again?

Yes  No  Don't know

7. Please rate your overall satisfaction with this test.

Very good  Good  Barely Acceptable  Poor  Very poor

#### MRI

1. Please rate the preparation and information prior to this test.

Very good  Good  Barely Acceptable  Poor  Very poor

2. Please rate your degree of concern prior to this test.

No concern  Little  Moderate  Intense  Very intense

In case you were concerned: **Why** were you concerned? .....

3. Please rate the comfort of this test.

Very good  Good  Barely Acceptable  Poor  Very poor

4. Please rate your degree of helplessness during this test.

No helplessness  Little  Moderate  Intense  Very intense

5. Please rate your pain during and after this test on the following scale.

*No pain*

\_\_\_\_\_

*Maximum pain*

6. Would you be willing to undergo this test again?

Yes  No  Don't know

7. Please rate your overall satisfaction with this test.

Very good  Good  Barely Acceptable  Poor  Very poor

## Supporting Information

### Angio

1. Please rate the preparation and information prior to this test.

Very good  Good  Barely Acceptable  Poor  Very poor

2. Please rate your degree of concern prior to this test.

No concern  Little  Moderate  Intense  Very intense

In case you were concerned: **Why** were you concerned? .....

3. Please rate the comfort of this test.

Very good  Good  Barely Acceptable  Poor  Very poor

4. Please rate your degree of helplessness during this test.

No helplessness  Little  Moderate  Intense  Very intense

5. Please rate your pain during and after this test on the following scale.

*No pain*

\_\_\_\_\_

*Maximum pain*

6. Would you be willing to undergo this test again?

Yes  No  Don't know

7. Please rate your overall satisfaction with this test.

Very good  Good  Barely Acceptable  Poor  Very poor

### Summary

1. Which test would you prefer for future imaging of the coronary arteries?

.....

2. Please describe other important thoughts about the three tests on the following lines and name the advantages and disadvantages of the tests using the table below.

.....  
 .....  
 .....

|       | Advantages | Disadvantages |
|-------|------------|---------------|
| CT    |            |               |
| MRI   |            |               |
| Angio |            |               |
